# Supplementary material for: Dose-dependent effects of xylooligosaccharides on glycemic regulation with L. rhamnosus CCFM1060 in diabetic mice
Source: Royal Society of Chemistry journal article supplement (doi:10.1039/d3fo00162h), 2023-01-01
Supplement: d3fo00162h1.pdf [file d3fo00162h1.pdf]

## Electronic Supplementary Material (ESI) for Food & Function

### Supplementary Tables

Table S1 Content (umol/g) of cecal SCFAs after *L. rhamnosus* CCFM1060 and combined with different doses of XOS intervention

| Group       | Control                 | Model                   | Rosiglitazone            | <i>L. rhamnosus</i>     | L-LXOS                   | L-HXOS                  |
|-------------|-------------------------|-------------------------|--------------------------|-------------------------|--------------------------|-------------------------|
| Acetate     | 7.0 ± 1.2 <sup>a</sup>  | 6.7 ± 1.0 <sup>a</sup>  | 13.0 ± 3.4 <sup>bc</sup> | 13.9 ± 1.8 <sup>c</sup> | 10.8 ± 2.0 <sup>bc</sup> | 10.3 ± 2.0 <sup>b</sup> |
| Propionate  | 2.9 ± 0.9 <sup>a</sup>  | 2.7 ± 1.0 <sup>a</sup>  | 4.6 ± 1.3 <sup>b</sup>   | 4.7 ± 0.9 <sup>b</sup>  | 3.7 ± 1.0 <sup>ab</sup>  | 2.7 ± 0.9 <sup>a</sup>  |
| Butyrate    | 3.1 ± 0.9 <sup>ab</sup> | 2.4 ± 0.4 <sup>a</sup>  | 5.2 ± 0.6 <sup>cd</sup>  | 6.0 ± 1.1 <sup>d</sup>  | 4.6 ± 0.7 <sup>c</sup>   | 3.8 ± 1.0 <sup>b</sup>  |
| Total SCFAs | 13.0 ± 1.7 <sup>a</sup> | 11.8 ± 1.3 <sup>a</sup> | 22.8 ± 3.6 <sup>c</sup>  | 24.5 ± 3.2 <sup>c</sup> | 19.1 ± 2.4 <sup>b</sup>  | 16.8 ± 2.5 <sup>b</sup> |

The data are presented as the mean ± standard deviation. Different letters in table indicate a significant difference between groups ( $P < 0.05$ ).

Table S2 Significantly increased KEGG pathways compared with the model group using two-sided Welch's t test at  $P < 0.05$ 

| KEGG pathways                             | <i>L. rhamnosus</i>                         | L-LXOS                                      | L-HXOS                                          |
|-------------------------------------------|---------------------------------------------|---------------------------------------------|-------------------------------------------------|
| Membrane transport                        | Phosphotransferase system (PTS)             | PTS                                         | PTS                                             |
| Carbohydrate Metabolism                   | Amino sugar and nucleotide sugar metabolism | Amino sugar and nucleotide sugar metabolism | Amino sugar and nucleotide sugar metabolism     |
|                                           | Glycolysis/Gluconeogenesis                  | NS                                          | NS                                              |
|                                           | Starch and sucrose metabolism               | NS                                          | NS                                              |
|                                           | NS                                          | Pentose phosphate pathway                   | Pentose phosphate pathway                       |
| Energy metabolism                         | NS                                          | Homologous recombination                    | Homologous recombination                        |
| Lipid Metabolism                          | Primary bile acid biosynthesis              | Primary bile acid biosynthesis              | Primary bile acid biosynthesis                  |
|                                           | Secondary bile acid biosynthesis            | Secondary bile acid biosynthesis            | Secondary bile acid biosynthesis                |
|                                           | Glycerolipid metabolism                     | NS                                          | NS                                              |
| Metabolism of Other Amino Acids           | Phosphonate and phosphinate metabolism      | NS                                          | NS                                              |
| Nucleotic Metabolism                      | Purine metabolism                           | Purine metabolism                           | Purine metabolism                               |
| Glycan biosynthesis and metabolism        | NS                                          | Peptidoglycan biosynthesis                  | Peptidoglycan biosynthesis                      |
| Replication and repair                    | Mismatch repair                             | Mismatch repair                             | NS                                              |
|                                           | DNA replication                             | DNA replication                             | DNA replication                                 |
|                                           | Nucleotide excision repair                  | Nucleotide excision repair                  | Nucleotide excision repair                      |
| Metabolism of Terpenoids and Polyketides  | Terpenoid backbone biosynthesis             | Terpenoid backbone biosynthesis             | Terpenoid backbone biosynthesis                 |
|                                           | NS                                          | NS                                          | Zeatin biosynthesis                             |
| Metabolism of cofactors and vitamins      | NS                                          | One carbon pool by folate                   | One carbon pool by folate                       |
| Translation                               | NS                                          | NS                                          | Ribosome                                        |
|                                           | NS                                          | NS                                          | Aminoacyl-tRNA biosynthesis                     |
| Amino acid metabolism                     | NS                                          | NS                                          | Lysine biosynthesis                             |
|                                           | NS                                          | NS                                          | Glycine, serine and threonine metabolism        |
| Xenobiotics biodegradation and metabolism | NS                                          | NS                                          | Chlorocyclohexane and chlorobenzene degradation |

NS, no important significance compared with the model group.

Table S3 Differential KEGG pathways compared with the *L.rhamnosus* group using two-sided Welch's t test at  $P < 0.05$ 

| OKGG                                      | L-LXOS                                  | L-HXOS                                       |
|-------------------------------------------|-----------------------------------------|----------------------------------------------|
| Carbohydrate Metabolism                   | Pyruvate metabolism↓                    | NS                                           |
|                                           | Butanoate metabolism↓                   | NS                                           |
|                                           | Starch and sucrose metabolism↓          | Starch and sucrose metabolism↓               |
|                                           | C5-Branched dibasic acid metabolism↑    | C5-Branched dibasic acid metabolism↑         |
| Energy metabolism                         | Nitrogen metabolism↓                    | NS                                           |
|                                           | NS                                      | Methane metabolism↓                          |
| Lipid Metabolism                          | Fatty acid metabolism↓                  | NS                                           |
|                                           | Glycerolipid metabolism↓                | Glycerolipid metabolism↓                     |
|                                           | Glycerophospholipid metabolism↓         | Glycerophospholipid metabolism↓              |
| Metabolism of Other Amino Acids           | Glutathione metabolism↓                 | NS                                           |
|                                           | Phosphonate and phosphinate metabolism↓ | Phosphonate and phosphinate metabolism↓      |
| Glycan biosynthesis and metabolism        | NS                                      | Lipopolysaccharide biosynthesis↑             |
|                                           | N-Glycan biosynthesis↑                  | N-Glycan biosynthesis↑                       |
|                                           | Other glycan degradation↑               | Other glycan degradation↑                    |
| Metabolism of Terpenoids and Polyketides  | NS                                      | Zeatin biosynthesis↑                         |
| Metabolism of cofactors and vitamins      | Thiamine metabolism↓                    | Thiamine metabolism↓                         |
|                                           | NS                                      | Riboflavin metabolism↓                       |
|                                           | NS                                      | Pantothenate and CoA biosynthesis↑           |
|                                           | NS                                      | Vitamin B6 metabolism↑                       |
|                                           | NS                                      | One carbon pool by folate↑                   |
|                                           | NS                                      | Porphyrin and chlorophyll metabolism↓        |
|                                           | NS                                      | Folate biosynthesis↓                         |
|                                           | NS                                      | Ribosome↑                                    |
| Translation                               | NS                                      | Ribosome↑                                    |
|                                           | Tyrosine metabolism↓                    | Tyrosine metabolism↓                         |
|                                           | NS                                      | D-Arginine and D-ornithine metabolism↓       |
|                                           | NS                                      | Valine, leucine and isoleucine biosynthesis↑ |
| Xenobiotics biodegradation and metabolism | NS                                      | D-Glutamine and D-glutamate metabolism↑      |
|                                           | Nitrotoluene degradation↓               | Nitrotoluene degradation↓                    |
|                                           | Aminobenzoate degradation↓              | NS                                           |
| Folding, sorting and degradation          | Sulfur relay system↓                    | Sulfur relay system↓                         |

↑, significantly increased compared with the *L.rhamnosus* group; ↓, significantly decreased compared with the *L.rhamnosus* group; NS, no important significance compared with the *L.rhamnosus* group.

## Supplementary Figures

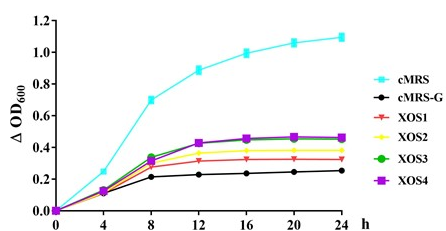

Fig. S1 Growth of *L. rhamnosus* CCFM1060 on different doses of XOS substrates *in vitro*. cMRS-G, cMRS medium without glucose; XOS1-4, cMRS medium without glucose but containing 25, 37.5, 50, 62.5 mg/ml XOS, respectively.

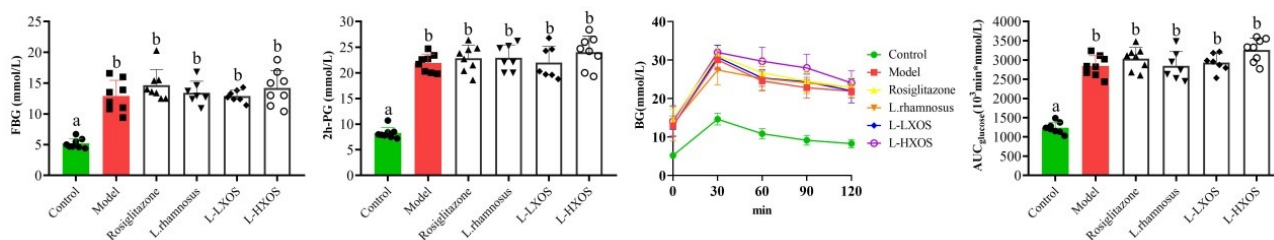

Fig. S2 FBG and OGTT 1 weeks after STZ injection. Graphs show mean  $\pm$  standard deviation;  $n = 8$ . Different superscript letters in a column indicate statistical differences between groups ( $P < 0.05$ ).

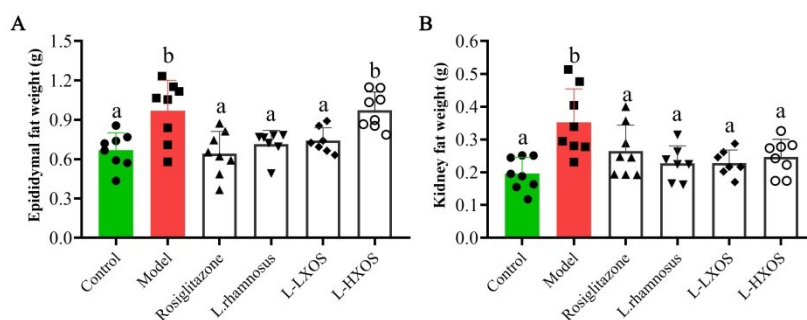

Fig. S3 Effects of *L. rhamnosus* CCFM1060 and combined with different doses of XOS on the adipose tissue of diabetic mice. (A) Epididymal fat weight. (B) Kidney fat weight. Graphs show mean  $\pm$  standard deviation;  $n = 8$ . Different superscript letters in a column indicate statistical differences between groups ( $P < 0.05$ ).

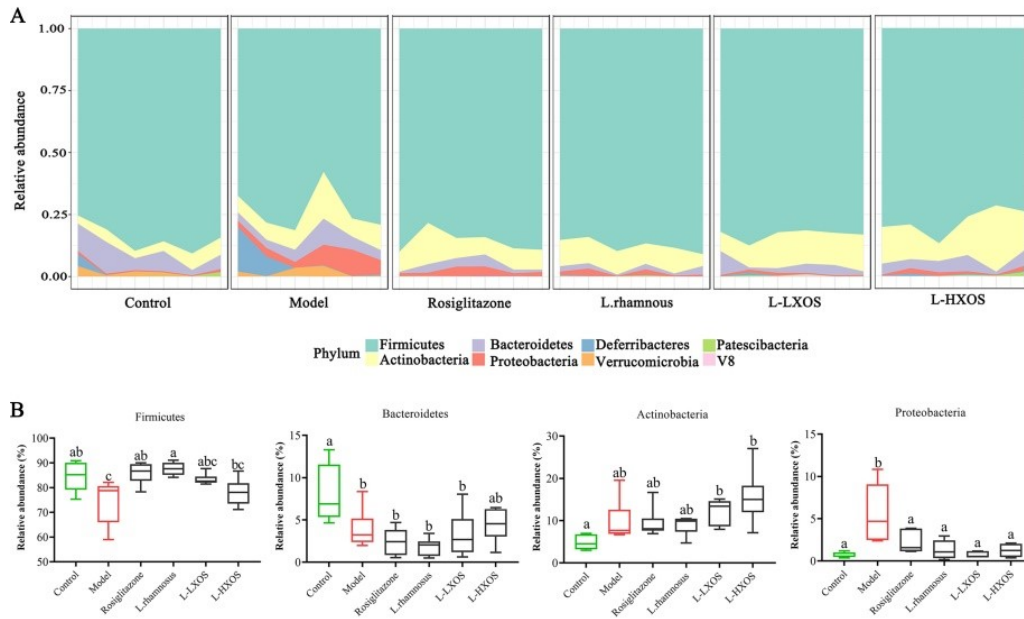

Fig. S4 Effects of *L. rhamnosus* CCFM1060 and combined with different doses of XOS on the structure at the phylum level of the gut flora (A) Microbial distribution at the phylum level. (B) Relative abundance of *Actinobacteria*, *Bacteroidetes*, *Firmicutes* and *Proteobacteria*. Graphs show mean  $\pm$  SD; n = 6; Different superscript letters in a column indicate statistical differences between groups ( $P < 0.05$ ).

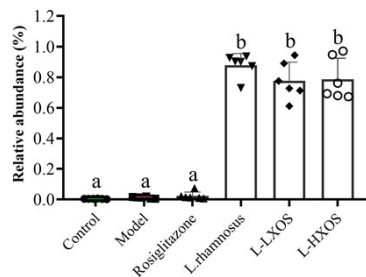

Fig. S5 Effects of *L. rhamnosus* CCFM1060 and combined with different doses of XOS on relative abundance of the *L. rhamnosus* in the intestine of mice. Different superscript letters in a column indicate statistical differences between groups ( $P < 0.05$ )

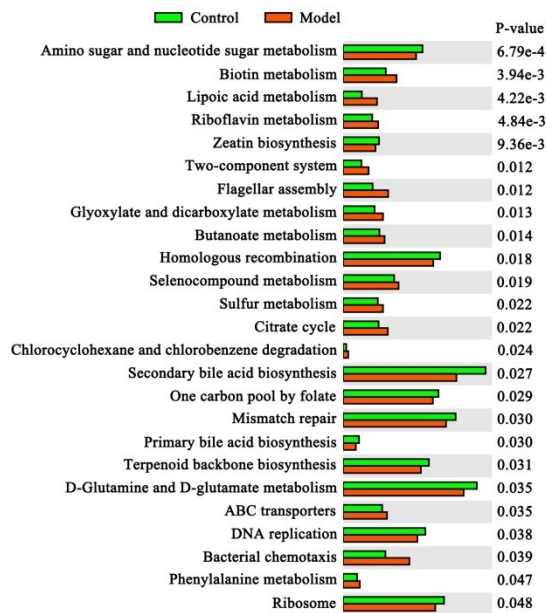

Fig. S6 Differential KEGG pathways between the model and control groups using two-sided Welch's t test at  $P < 0.05$
